# Supplementary material for: Synthesis of [{AgO2CCH2OMe(PPh3)}n] and theoretical study of its use in focused electron beam induced deposition
Source: publisher site journal article supplement (doi:10.3762/bjnano.8.262), 2017-12-06
Supplement: Additional file 1 [file 2190-4286-8-262-S1.pdf]

# Supporting Information

for

## Synthesis of $[\{AgO_2CCH_2OMe(PPh_3)\}_n]$ and theoretical study of its use in focused electron beam induced deposition

Jelena Tamuliene<sup>\*1,§</sup>, Julian Noll<sup>2</sup>, Peter Frenzel<sup>2</sup>, Tobias Ruffer<sup>2</sup>, Alexander Jakob<sup>2</sup>,  
Bernhard Walfort<sup>2</sup> and Heinrich Lang<sup>\*2,¶</sup>

Address: <sup>1</sup>Vilnius University, Institute of Theoretical Physics and Astronomy, Sauletekio av.  
3, Vilnius, Lithuania and <sup>2</sup>Faculty of Natural Sciences, Institute of Chemistry, Inorganic  
Chemistry, D-09107 Chemnitz, Germany

Email: Jelena Tamuliene - Jelena.Tamuliene@tfai.vu.lt;

Heinrich Lang - heinrich.lang@chemie.tu-chemnitz.de

\*Corresponding author

§ Phone +370 5-223-34644; Fax +370 5-2125361

¶ Phone +49 371-531-21210; Fax +49 371-531-21219

## Additional figures and tables

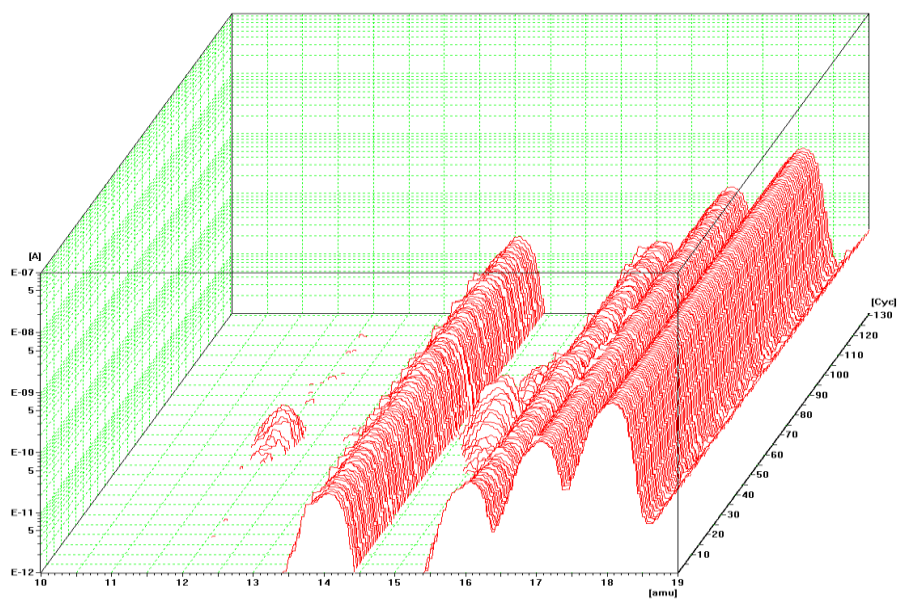

**Figure S1:** Selected masses ( $m/z = 10-19$ ) of a time-resolved MS spectra during TG measurements of **2**.

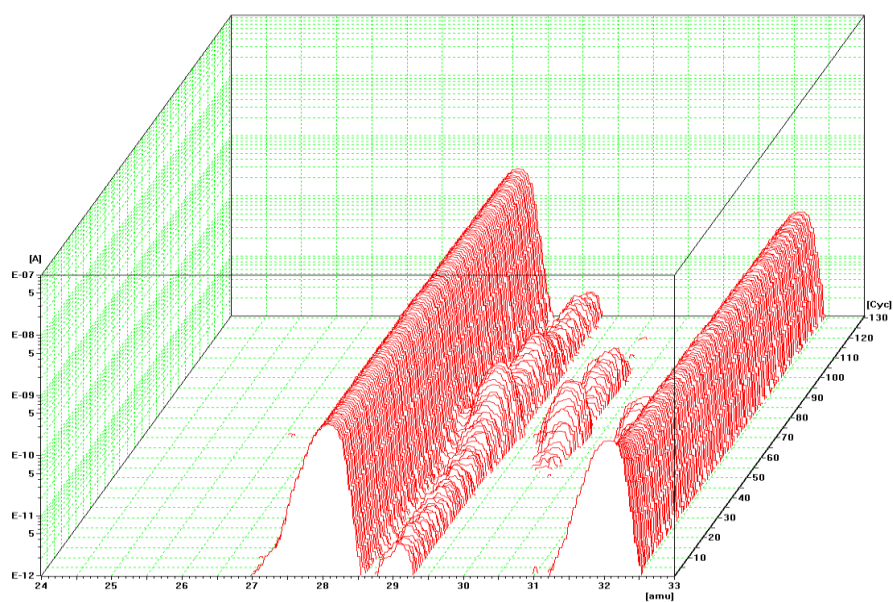

**Figure S2:** Selected masses ( $m/z = 24-33$ ) of a time-resolved MS spectra during TG measurements of **2**.

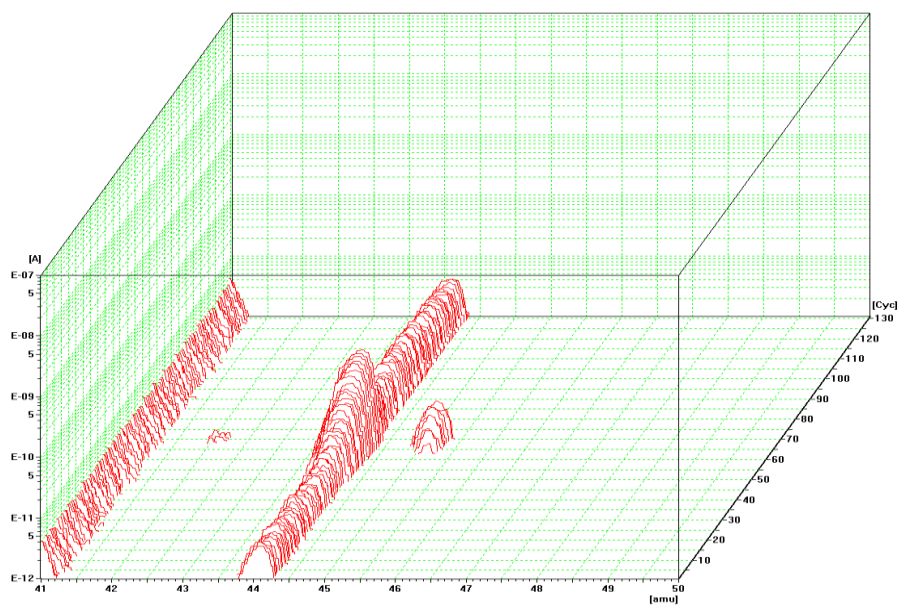

**Figure S3:** Selected masses ( $m/z = 41-50$ ) of a time-resolved MS spectra during TG measurements of **2**.

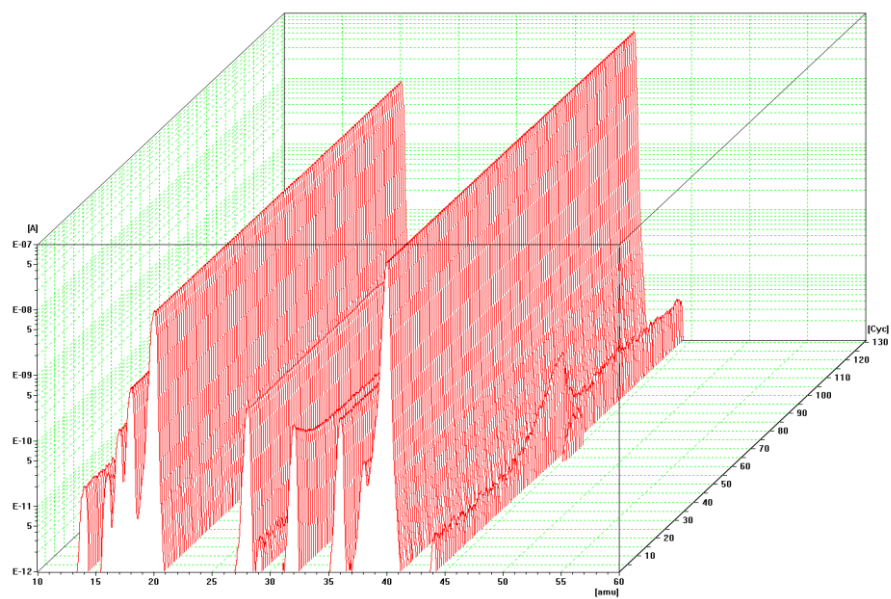

**Figure S4:** Selected masses ( $m/z = 10-60$ ) of a time-resolved MS spectra during TG measurements of **2**.

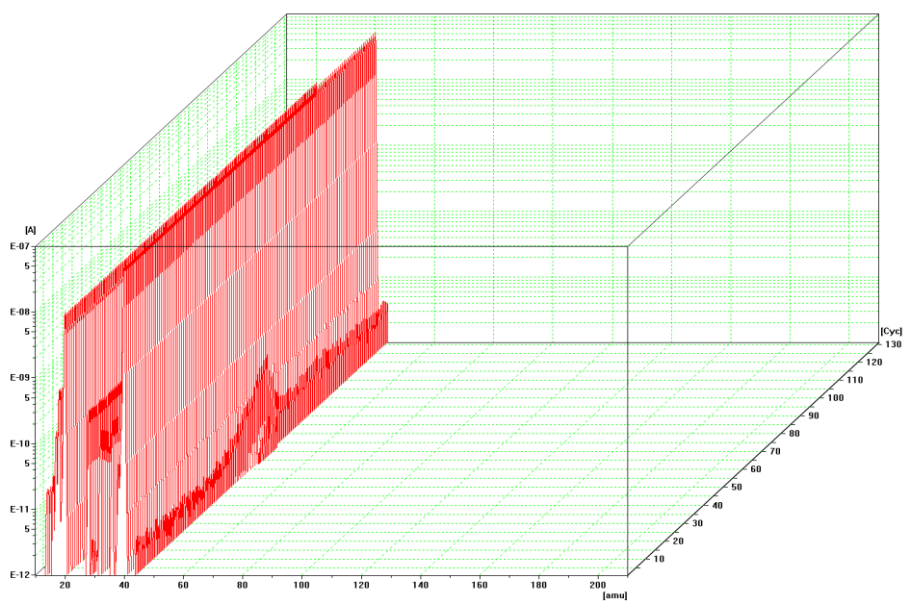

**Figure S5:** Selected masses ( $m/z = 10-210$ ) of a time-resolved MS spectra during TG measurements of **2**.

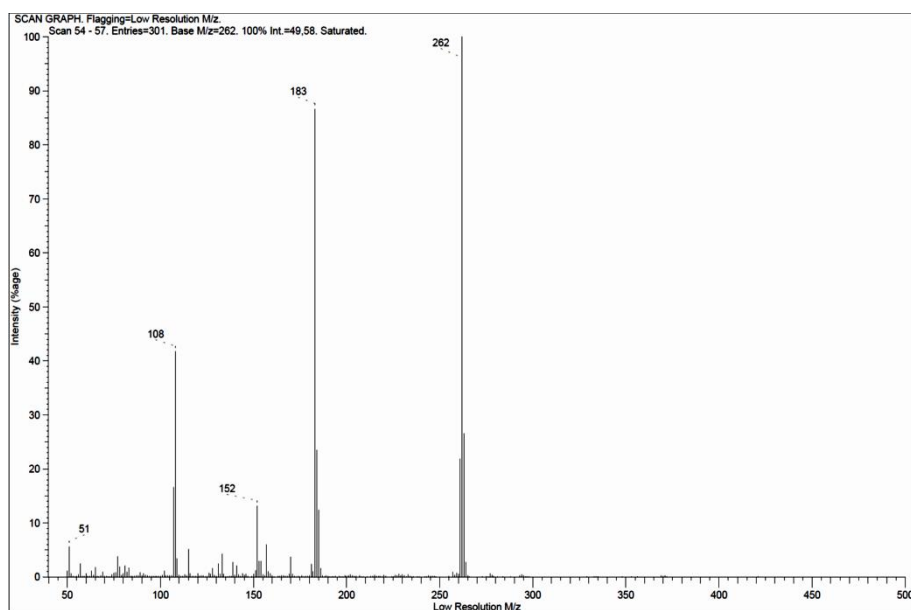

**Figure S6:** EI-MS spectra of **2** ( $m/z = 40-500$ ).

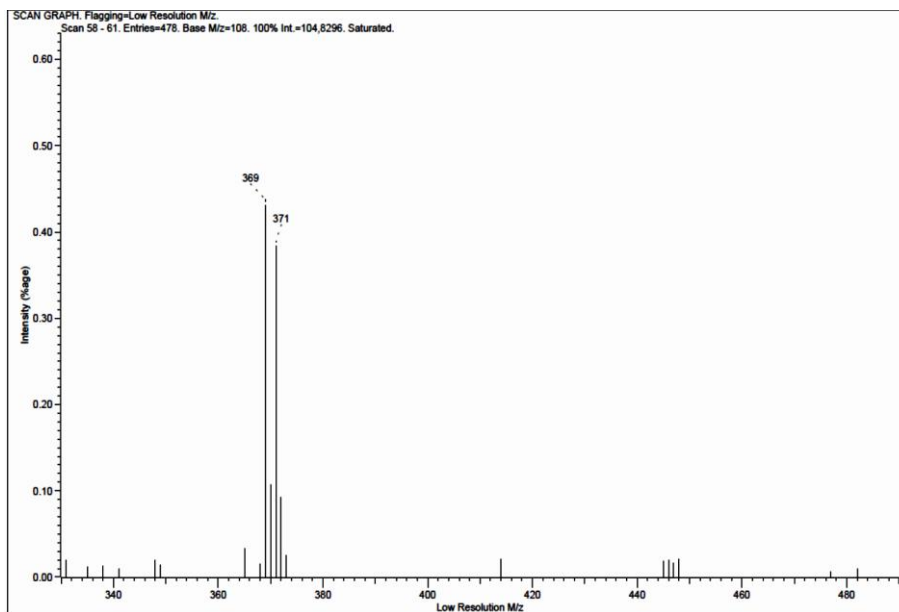

**Figure S7:** EI-MS spectra of **2** ( $m/z = 330\text{--}490$ ).

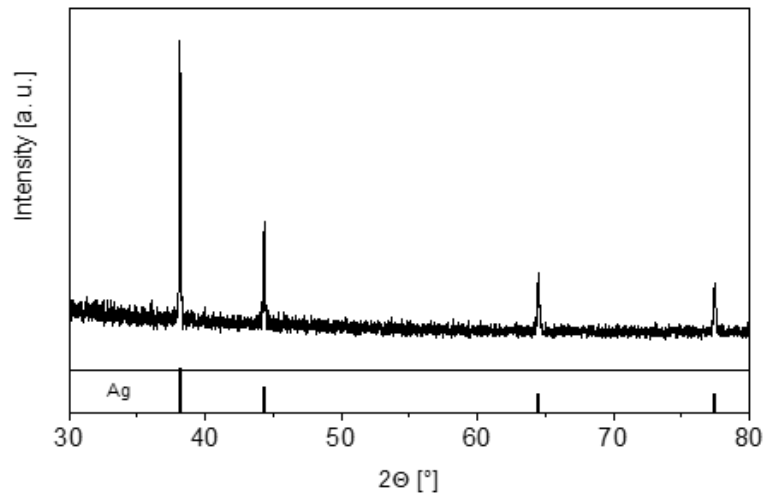

**Figure S8:** PXRD pattern of elemental silver after heat treatment of **1** (500 °C) with reflections of silver [ICDD: 03-065-2871].

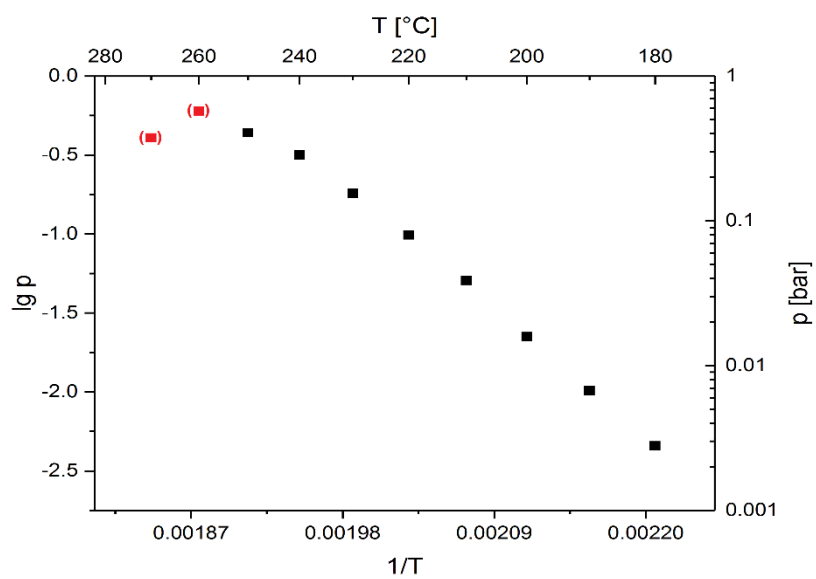

**Figure S9:** Vapor pressure of **2** ( $\text{N}_2$ , gas flow  $60 \text{ mL min}^{-1}$ ). Red marked measurement points imply decomposition of **2**.
